1     ***Two distinct networks containing position-tolerant representations of actions in the***  
2                                                            ***human brain***

3

4                   Elahé Yargholi<sup>1\*</sup>, Gholam-Ali Hossein-Zadeh<sup>1,2</sup>, Maryam Vaziri-Pashkam<sup>3</sup>

5     <sup>1</sup> School of Cognitive Sciences, Institute for Research in Fundamental Sciences, Tehran, Iran

6     <sup>2</sup> School of Electrical and Computer Engineering, College of Engineering, University of Tehran,

7                                                            Tehran, Iran

8     <sup>3</sup> National Institute of Mental Health (NIMH), Laboratory of Brain and Cognition, MD, USA

9

10

11  \*corresponding author: [elahe.yargholi@gmail.com](mailto:elahe.yargholi@gmail.com), [elahe.yargholi@ut.ac.ir](mailto:elahe.yargholi@ut.ac.ir)

12

## Abstract

13 Humans can recognize other people's actions in the social environment. This action recognition  
14 ability is rarely hindered by the movement of people in the environment. The neural basis of this  
15 tolerance to changes in the position of observed actions is not fully understood. Here, we aimed  
16 to identify brain regions capable of generalizing representations of actions across different  
17 positions and investigate the representational content of these regions. fMRI data were  
18 recorded from twenty-two subjects while they were watching video clips of ten different human  
19 actions in Point Light Display format. Each stimulus was presented in either the upper or the  
20 lower visual fields. Multivoxel pattern analysis and a searchlight technique were employed to  
21 identify brain regions that contain position-tolerant action representation: linear support vector  
22 machine classifiers were trained with fMRI patterns in response to stimuli presented in one  
23 position and tested with stimuli presented in another position. Results of this generalization test  
24 showed above-chance classification in the left and right lateral occipitotemporal cortex, right  
25 intraparietal sulcus, and right post-central gyrus. To explore the representational content of  
26 these regions, we constructed models based on the objective measures of movements and  
27 human subjective judgments about actions. We then evaluated the brain similarity matrix from  
28 the cross-position classification analysis based on these models. Results showed cross-position  
29 classifications in the lateral occipito-temporal ROIs were more strongly related to the subjective  
30 judgments, while those in the dorsal parietal ROIs were more strongly related to the objective  
31 movements. An ROI representational similarity analysis further confirmed the separation of the  
32 dorsal and lateral regions. These results provide evidence for two networks that contain abstract  
33 representations of human actions with distinct representational content.

34

35 *Keywords:* action observation, position invariance, fMRI, multivariate pattern analysis.

36

## Introduction

37

38

39

40

41

42

43

44

45

46

47

48

49

50

51

52

53

54

55

56

57

58

59

60

61

Humans can rapidly and accurately recognize other people's actions in the social environment. People's movement in the environment introduces often dramatic changes in the viewpoint, size, and position of their image on the retina. This confounding variability renders the action recognition task computationally challenging. Yet, humans' ability to recognize actions is rarely hindered by this variability. A brain region that subserves human action recognition ability is expected to: 1) contain information about various human actions and 2) contain action representations that are tolerant to the variability in the visual input. Here, using functional MRI and multi-voxel pattern analysis, we aim to identify such regions using changes in the position of the actor as the source of variability. After identifying these regions, we aim to explore their representational content and determine to what extent they relate to human subjective judgments about actions or objective measures of body movements. Previous studies that have explored tolerance of visual representations to variability in the input have mostly focused on static pictures of objects and human bodies. Regions in both occipitotemporal (Konen and Kastner, 2008; Cichy et al., 2011, 2013; Anzellotti et al., 2013; Ramírez et al., 2014) and parietal cortices (Konen and Kastner, 2008) have been identified that contain position, size, and viewpoint tolerant representation of static objects (Konen and Kastner, 2008; Mur et al., 2010; Cichy et al., 2011, 2013; Anzellotti et al., 2013; Ramírez et al., 2014; Xu and Vaziri-Pashkam, 2020). This characteristic has been proposed as a defining feature of regions that contribute to human abstract object knowledge (Dicarlo and Cox, 2007). In the domain of observed actions, despite the large body of literature that identifies regions in the occipitotemporal and parietal cortices that respond to (Casper et al., 2010; Kalenine et al., 2010; Grosbras et al., 2012; Watson et al., 2013; Urgesi et al., 2014) and contain information about (e.g., Wheaton et al., 2004; Jastorff et al., 2010; Abdollahi et al., 2013; Lignau and Downing, 2015; Ferri et al., 2015; Hafri et al., 2017; Wurm et al., 2017b; Urgen et al., 2019; Tucciarelli et al., 2019; Tarhan and Konkle, 2020; Urgen and Orban, 2021) observed actions,

62 evidence for the tolerance of these representations to changes in the position of the actors is  
63 still scant.

64 Previous studies have extensively investigated the tolerance of action representations to  
65 changes in viewpoint in both monkeys (Oram and Perrett, 1996; Vangeneugden et al., 2014;  
66 Caggiano et al., 2011; Maeda et al., 2015; Maranesi et al., 2015; Barz et al., 2017; Simone et  
67 al., 2017; Livi et al., 2019; Albertini et al., 2020; Lanzilotto et al., 2020) and humans (Grossman  
68 et al., 2010; Ogawa and Inui, 2011; Oosterhof et al., 2012; Tucciarelli et al., 2015; Isik et al.,  
69 2016). Results of these human studies provide evidence for viewpoint tolerance in the lateral  
70 occipito-temporal (Grossman et al., 2010; Tucciarelli et al., 2015) and parietal cortices (Ogawa  
71 and Inui, 2011; Oosterhof et al., 2012). In contrast to viewpoint tolerance, position tolerance has  
72 not been extensively explored. Grossman et al. (2010) employed an fMRI adaptation approach  
73 to investigate position tolerance in the human brain. They found that a region in human STS  
74 shows tolerance to variations in the position of observed actions. They did not systematically  
75 investigate the position sensitivity of parietal action selective regions. The fMRI adaptation  
76 technique used in this study may not have sufficient power in identifying the full scope of  
77 position tolerance in action selective regions compared to other techniques such as multi-voxel  
78 pattern analysis (MVPA, Haxby, 2012) that directly investigate the representational content of a  
79 region. Roth and Zohary (2015) employed MVPA (correlation and cross-decoding) to study  
80 position tolerance during observation of tool-grasping movements in humans. Their stimuli were  
81 presented in various locations, and position tolerance was examined for presentations in the left  
82 and right visual fields. They discovered that position information is gradually lost, and hand/tool  
83 identity information is enhanced along the posterior-anterior axis in the dorsal stream. However,  
84 their study was limited to grasping movements. It is not obvious if their results would generalize  
85 to full-body movements.

86 Other studies that have employed MVPA have often used natural stimuli in which actions  
87 happen at different positions, but they have averaged the responses across stimuli instead of

88 systematically investigating the tolerance of representations across changes in position.  
89 Therefore it is hard to speculate about the extent of position tolerance in action selective regions  
90 from these studies (Hafri et al., 2017; Wurm et al., 2017b; Tarhan and Konkle, 2020). As such, a  
91 systematic investigation of position tolerance across dorsal and ventral action selective regions  
92 is still missing in the literature. In this study, we will use MVPA and cross-position decoding  
93 using a support vector machine classifier to search for position tolerant representations of  
94 actions in the human brain. Finding these regions, we will then investigate their representational  
95 content using a representational similarity analysis (Kriegeskorte et al., 2008).

96         Several theories have been proposed to characterize the role of individual action  
97 selective regions in the processing of action stimuli. In the occipito-temporal cortex, a division of  
98 labor has been suggested between regions such as EBA that process the form of the body and  
99 regions such as STS that process the movement of the body (Giese & Poggio, 2003; Peelen et  
100 al., 2006; Grossman et al., 2010; Michels et al., 2005; Downing et al., 2006; Vangeneugden et  
101 al., 2016 refs from Vangeneugden; Jastorff and Orban, 2009). These studies do not elaborate  
102 on the representational content of these regions. A few studies have taken a step further to  
103 establish the principles of coding in action selective regions. Within the lateral occipital cortex,  
104 Wurm et al. (2017b) have suggested that the neural representation of hand actions is organized  
105 based on the extent of sociality and transitivity of these actions. Recently, in a study with a large  
106 set of natural images of actions, Tucciarelli et al. (2019) compared the similarity in neural  
107 representation with their semantic similarity obtained from behavioral ratings. They showed that  
108 the neural organization of observed actions in the lateral occipito-temporal cortex is correlated  
109 with the behavioral similarity judgments.

110         Investigations to the representational content of parietal action selective regions are  
111 fewer in number, and their results are more subject to debate. Shmuelof and Zohary (2006,  
112 2008) have proposed an effector dependent representation of hand actions in the anterior  
113 intraparietal cortex, while others have argued actions are represented in an effector

114 independent manner in the inferior parietal lobe (Jastorff et al., 2010) as well as superior parietal  
115 lobe and intraparietal sulcus (Vingehoets et al., 2012). One study (Jastorff et al., 2010)  
116 suggested that action representations in the parietal cortex are related to the direction of the  
117 action relative to the body.

118         Looking at the entire visual system, Tarhan and Konkle (2020) used an encoding model  
119 to predict responses to natural videos. The feature space of their model captured the body parts  
120 involved in an action and the action target. Based on the voxel tuning, they suggested that five  
121 large-scale networks exist in the human brain that represent actions based on their sociality and  
122 the spatial extent of their interaction envelope. All these studies have employed natural videos  
123 of actions in which often a whole scene and objects are present. Employing natural stimuli may  
124 lead to many confounding factors and difficulties in interpreting the results. Even though some  
125 of these studies have taken steps to make sure low-level features are not contributing to their  
126 results (Tucchiarelli et al., 2019; Tarhan and Konkle, 2020), there is a possibility their results may  
127 be related to the presence of special types of objects, scene contexts and semantic relations  
128 between them (Kourtzi and Kanwisher, 2000; Senior et al., 2000; Johnson-Frey, 2004;  
129 Buxbaum et al., 2006; Wurm et al., 2012; Schubotz et al., 2014; el-sourani et al., 2017; Wurm  
130 and Schubotz, 2017; Wurm et al., 2017a; Leshinskaya et al., 2018).

131         Here, employing fMRI multivoxel pattern analysis, we decoded the position invariant  
132 representation of human actions in point-light display (PLD) format. We used controlled stimuli  
133 in PLD format to restrict the visual information to the bodily movements and identify regions  
134 supporting abstract action representations. Using these controlled action stimuli, we localized  
135 regions where action decoding was robust to changes in position. Employing PLD stimuli also  
136 allowed us to determine the position and movements of individual limbs, to devise objective  
137 measures for constructing similarity between actions. Using these objective measures of  
138 similarity as well as subjective measures derived from behavioral experiments, we characterized  
139 the representational content of action selective regions.

140

141

## Materials and Methods

### 142 **Participants**

143           Twenty-five subjects (14 females, 20-38 years of age) took part in the fMRI experiment  
144 and 15 subjects (13 females, 25-38 years of age) took part in the behavioral experiment. All  
145 subjects were healthy and right-handed with normal visual acuity. They gave written informed  
146 consent and received payment for their participation. The experiments were approved by the  
147 ethics committee on the use of human subjects at the Iran University of Medical Sciences.  
148 Three fMRI subjects were later excluded due to excessive motion (see data analysis for more  
149 details) and the final analyses included the remaining 22 subjects.

150

### 151 **Functional MRI experiment**

152           In this experiment, we used videos of 10 different human actions in Point Light Display  
153 (PLD) format: Crawl, Cycle, Jumping Jack (henceforth referred to as Jump), Peddle, Play  
154 tennis, Salute, Spade, Stir, Walk, and Wave (Figure 1). These actions were selected from a  
155 larger set of human action videos in PLD format provided by Vanrie and Verfaillie (2004).  
156 We used a block design paradigm. Each run included twenty blocks with two blocks for each  
157 human action video. In one of the blocks for each action, the video was presented in the upper  
158 visual hemifield, and in the other, it was presented in the lower visual hemifield. The  
159 presentation order of the stimuli was counterbalanced across runs. Each block lasted 8  
160 seconds. There was an 8-second blank period in the beginning, end, and between stimulus  
161 blocks of each run. Each run lasted 328 seconds. Each subject completed one session of 10  
162 runs.

163           In each stimulus block, there were four repetitions of the same human action video.  
164 Each repetition lasted 1.5 seconds (frame rate 30), followed by a 0.5 second blank period. In a  
165 randomly chosen repetition in each block, the size of the dots became 50% larger for one

166 second. The point-lights, subtending  $\sim 0.25$  degrees of visual angle, were in white color against  
167 a black background. The center of the stimuli was presented  $\sim 4$  degrees of visual angle  
168 above/below the fixation point. The size of the area that the dots occupied during movements  
169 was between 0.94 and 5.62 degrees in width and between 2.38 and 7.7 degrees in height.

170 The fixation point was a red circle of size  $\sim 0.25$  degrees of visual angle. Subjects were  
171 instructed to fixate on the fixation point at the center of the screen, watch the videos, detect the  
172 change in the size of the point lights, and report it by pressing a response key with their right  
173 index finger.

174

## 175 **Behavioral experiment**

176 To capture the similarity between our human action stimuli, we conducted a behavioral  
177 experiment based on an inverse multi-dimensional scaling (IMDS) method proposed by  
178 (Kriegeskorte & Mur, 2012). At the beginning of the experiment, one snapshot from each of the  
179 ten action videos was presented along with a number 1-10 in two vertical columns at the left  
180 border of the screen. On a separate screen, they were provided with numbered action videos,  
181 and they could watch them as many times as they needed. Participants were asked to  
182 rearrange the snapshots on the surface of a gray circle (drag and drop using the mouse)  
183 according to the perceived similarity of their corresponding videos. The arrangement was  
184 performed based on subjective judgments of overall similarity, and no other instructions were  
185 given regarding the specific aspects they needed to focus on for the arrangement. A behavioral  
186 dissimilarity matrix was obtained based on the final Euclidean distances on the circle for each  
187 participant.

188

## 189 **MRI methods**

190 MRI data were collected at two centers: the school of Cognitive Sciences, Institute for  
191 Research in Fundamental Sciences (Tehran, Iran) using a Siemens 3T Tim Trio MRI scanner



192 and a 32-channel head coil and the National Brain Mapping Lab (Tehran, Iran) using a Siemens  
193 3T Prisma MRI scanner and 20-channel or 64-channel head coil. We were forced to switch MRI  
194 equipment mid-experiment due to scanner/coil malfunction (data of 5 subjects were recorded at  
195 the school of Cognitive Sciences, and data of 20 subjects were recorded at National Brain  
196 Mapping Lab). We moved scanners to ensure that high-quality data was collected for all  
197 subjects. Similar protocols were used across scanners, and the data recorded with different  
198 equipment were comparable.

199         Subjects viewed the visual stimuli through a back-projection screen, and the task was  
200 presented using MATLAB and Psychtoolbox-3 (Brainard, 1997). Functional images were  
201 obtained using a T2<sup>\*</sup>-weighted single-shot gradient-echo EPI sequence with a repetition time  
202 (TR) of 2 s, echo time (TE) 26, 90° flip angle, 30 transverse slices, and a voxel size of 3 × 3 × 4  
203 mm<sup>3</sup>. A high-resolution T1-weighted structural scan was also acquired from each participant  
204 using an MPRAGE pulse sequence (TR = 1800 ms, TE = 3.44 ms, inversion time = 1100 ms, 7°  
205 flip angle, 176 sagittal slices, and 1 × 1 × 1 mm<sup>3</sup> isotropic voxels).

206

## 207 **Data analysis**

208         Freesurfer (<https://surfer.nmr.mgh.harvard.edu>) and FS-FAST (Dale et al., 1999) were  
209 employed for data preprocessing and general linear model (GLM) analysis. Preprocessing of  
210 fMRI data included motion correction, slice timing correction, linear and quadratic trend removal,  
211 and no spatial smoothing. Subjects with excessive head motion (more than 1.5 mm within a run  
212 and 4 mm across runs) were excluded (3 subjects). Functional data were then resampled to the  
213 cortical surface of individual subjects.

214         A run-wise GLM analysis was performed to obtain the beta values and their  
215 corresponding t statistic for each human action and each presentation hemifield in each vertex  
216 (10 human actions in the upper visual field and 10 human actions in the lower visual field

217 leading to 20 regressors). Linear and quadratic polynomial nuisance regressors and external  
218 regressors from the estimated head movements were also included.

219 Wang atlas of visual topography (Wang et al., 2014) was used to localize retinotopic  
220 areas for each subject: V1, V2, V3, hV4, VO1, VO2, MST, hMT, LO2, LO1, V3a, V3b, IPS0,  
221 IPS1, IPS2, IPS3, IPS4, IPS5, SPL1 (Figure 3).

222

### 223 **Multivariate pattern analysis (MVPA)**

224 In-house MATLAB codes, LibSVM (Chang and Lin, 2011), and CoSMoMVPA (Oosterhof  
225 et al., 2016) toolboxes were employed for searchlight and ROI analyses.

#### 226 ***Searchlight analysis:***

227 We performed action classification using a surface-based searchlight procedure to  
228 obtain a map of classification accuracy (Oosterhof et al., 2011). In a leave-one-run-out cross-  
229 validation procedure, samples (t-statistics of vertices) were partitioned to train and test sets. A  
230 linear Support Vector Machine (SVM) was employed to perform pairwise brain decoding  
231 classification for each presentation position (upper/lower visual hemifield) in individual brains  
232 with a searchlight circle of 100 vertices on the surface. The decoding accuracy of a searchlight  
233 was calculated as the average of all within position pairwise classification accuracies. The  
234 resulting maps were then resampled to a common surface for the group-level statistical  
235 analysis.

236 To determine regions showing position tolerance, we performed cross-position decoding  
237 by training a classifier to discriminate pairs of actions presented in one position and testing its  
238 accuracy in classifying the same pair of actions in the other position. A cross-position decoding  
239 accuracy greater than the chance level would indicate position tolerance.

240 To obtain group-level statistics, p-values of classification accuracies were computed  
241 using a binomial test, corrected for false discovery rate (Benjamini and Hochberg, 1995) at level  
242  $q_1$ . The second-level p-value for each vertex was then determined as

243 
$$Pr [Binomial(n, R * q1/(n * m)) \geq C]$$

244 With  $C$  denoting the number of participants for which that vertex was significant,  $R$  denoting the  
245 sum of the counts of  $C$  across all vertices,  $n$  denoting the number of participants, and  $m$   
246 denoting the number of vertices. Under the null hypothesis,  $C$  has a binomial distribution with  
247 size  $n$  and a probability that is approximately bounded by  $R * q1/(n * m)$ . Finally, the derived  
248 second-level  $p$ -values were thresholded at the FDR level  $q2$  to acquire the significant vertices at  
249 the group-level (McMahon et al., 2019). This approach is more appropriate than the  $t$ -test for  
250 comparing classification accuracies against chance level (See Allefeld et al., 2016 for a  
251 discussion of why the  $t$ -test is not suitable in such cases).

252 From the searchlight group-level statistical analysis, we obtained clusters with significant  
253 cross-positions classification accuracy. Contiguous clusters that passed the threshold were  
254 selected as ROIs in which decoding of actions could be generalized across positions and used  
255 in the next analyses to explore their representational structure. To ascertain that the ROI  
256 selection and further analyses are statistically independent and prevent double-dipping, we  
257 used a leave-one-subject-out approach (Etzel et al., 2013). The group-level statistical analysis  
258 was applied to the searchlight results of all subjects except one, and the resulting ROI was  
259 projected on the left-out subject to select the ROI in that subject. The procedure was repeated  
260 for each subject. The same clusters were found consistently across all iterations.

### 261 ***Comparing within and cross-position classification accuracies***

262 To directly compare within and cross-position classification accuracies, we performed  
263 SVM classifications within each ROI obtained from the leave-one-subject out analysis described  
264 above. The procedure for obtaining within- and cross-position classifications was the same as  
265 the searchlight analysis with the addition of feature selection. Different ROIs don't include the  
266 same number of vertices. This variation in the number of vertices across ROIs could influence  
267 classification accuracies. To avoid this potential confounding factor, the pairwise classifications  
268 were performed using the 100 most informative vertices in each ROI. To select the most

269 informative vertices, a t-test was applied on the training set, and 100 vertices with the lowest p-  
270 values for discriminating between the conditions of interest in the training set were chosen  
271 (Mitchell et al., 2004). It is noteworthy that the classification results didn't qualitatively differ  
272 without feature selection.

### 273 ***Exploring the representational content of the ROI***

274 To explore the representational content of the ROIs, we constructed models based on  
275 the body-part movements and behavioral ratings and examined the correlation between these  
276 models and the cross-position decoding accuracies for each ROI.

277 To obtain the body-part movement model, we divided the point lights into five groups:  
278 trunk (5 dots), left hand (2 dots), right hand (2 dots), left leg (2 dots), and right leg (2 dots). We  
279 obtained the sum of the displacements of point lights in each group for each action video. From  
280 the total displacements in each group, we obtained a five-element vector. Then, the Euclidean  
281 distance between these five-element vectors was used to obtain a dissimilarity matrix based on  
282 the body-part movement. This body-part movement model includes information on both the  
283 pattern of body-part movement and the average of their movement for each action. Hence, for  
284 further investigation, we examined two other models: body-movement-pattern and body-  
285 movement-average. To obtain the body-movement-pattern model for each action, we  
286 demeaned the corresponding five-element vector of the body-part movement model and  
287 obtained the Euclidean distance between these new demeaned vectors to build a dissimilarity  
288 matrix. The difference between the average values of body-part movement vectors was also  
289 used to obtain the body-movement-pattern model.

290 To obtain the behavioral dissimilarity model, the results from the behavioral experiment  
291 were used. In the behavioral experiment, the distance between stimuli indicates their  
292 (dis)similarity. The obtained dissimilarity matrix for each subject was normalized by dividing  
293 each value in the matrix by the maximum value. The pooled behavioral dissimilarity matrix was  
294 then computed as an average of individual normalized behavioral dissimilarity matrices.

295 To obtain the correlation between the models and the action representations in each  
296 ROI, the off-diagonal of the matrix obtained from the pairwise cross-position decoding  
297 accuracies was vectorized. The off-diagonal of the dissimilarity matrices from the models were  
298 also vectorized. The Kendall rank correlation between dissimilarity vectors and decoding  
299 accuracy vectors was then calculated, and the correlation values were compared to  
300 characterize the representational content of each ROI.

### 301 ***ROI similarity analysis***

302 We also performed the cross-position decoding accuracies for Wang's ROIs using a  
303 similar procedure as that used for the ROIs obtained from the searchlight analysis. Following a  
304 leave-one-run-out approach, a classifier was trained to decode pair of actions presented in one  
305 position and tested with the same pair of actions in another position. We applied a t-test on the  
306 training set to choose 100 vertices with the lowest p-values for discriminating between the  
307 actions of interest in each ROI. Then, to investigate the representational similarity between  
308 ROIs (Wang's ROIs and ROIs obtained from searchlight analysis), correlations were computed  
309 between the vectorized matrices of pairwise cross-position decoding accuracy. One minus  
310 these correlation values were used to obtain the distance between the ROI pairs, and these  
311 distances were used to construct an ROI dissimilarity matrix. The ROI dissimilarity matrix was  
312 first computed for individual subjects and then averaged across subjects to acquire group level  
313 ROI dissimilarity matrix (Figure 7A).

314 Split-half reliability of ROI dissimilarity matrix was also evaluated; we randomly divided  
315 subjects into two equal groups and correlated corresponding group-level ROI dissimilarity  
316 matrices as a measure of reliability. This measure was calculated for 10000 random split-half  
317 divisions and averaged to produce the final reliability measure. To examine the significance of  
318 this reliability measure, we obtained the bootstrapped null distribution of reliability by random  
319 shuffling of the labels in the correlation matrix separately for the two split-half groups and  
320 calculating the reliability for 10000 random samples.

321 An MDS analysis was then performed on this ROI-dissimilarity matrix, and the first two  
322 dimensions that captured most of the variance were used to produce an MDS diagram in which  
323 the distance between each pair of ROIs represents the similarity between them (Vaziri-Pashkam  
324 & Xu, 2018). The squared correlation ( $r^2$ ) between two-dimensional distances in the MDS plots  
325 and the original distances in the multi-dimensional space was used to quantify the variance  
326 explained by the first two dimensions. We then fit two regression lines employing the total least  
327 square method, with one line passing through the positions of the occipito-temporal regions and  
328 the other passing through the positions of parietal regions. The variance explained by the fitted  
329 lines was also measured; two-dimensional distances between regions based on the predicted  
330 positions on the lines were obtained, and the  $r^2$  between these distances and the original  
331 distances based on the input matrix to the MDS analysis was calculated. Similarly, we  
332 computed the  $r^2$  between distances based on the MDS plots and line predictions to determine  
333 the variance explained by the two lines on the MDS plot.

334

335

## Results

336

337

338

339

340

341

342

343

In the present study, we aimed to identify regions containing position tolerant representations of actions and investigate the representational content of these regions using fMRI multi-voxel pattern analysis. A stimulus set of ten different human action videos in PLD format (Figure 1) was presented at two different positions in the visual display (upper and lower visual hemifields), and t-values were extracted in each voxel of the brain for each of the actions and each position. Employing a support vector machine classifier, within- and cross-position decoding was then applied following a searchlight approach across the whole brain.

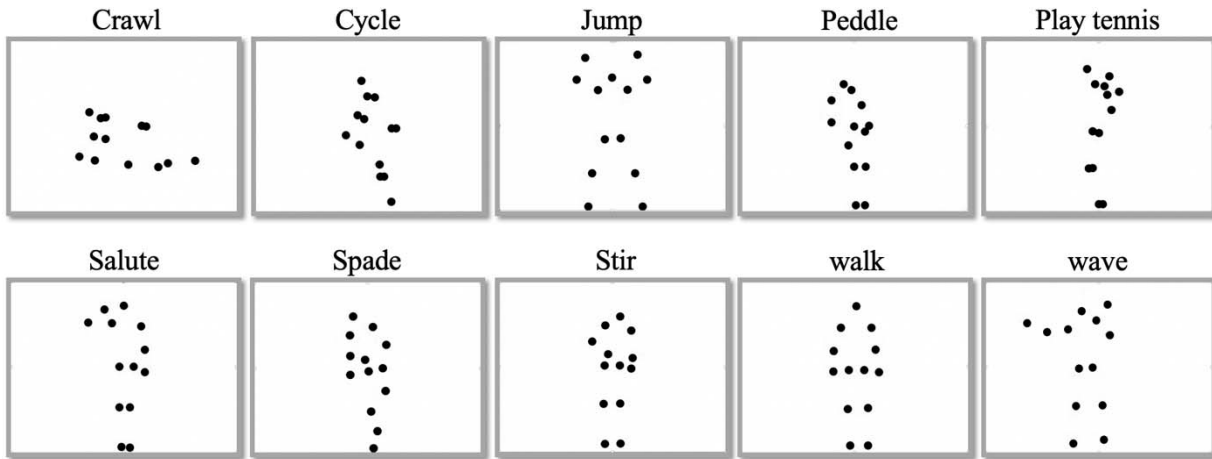

344

345 **Figure 1.** Representative frames of the 10 human action videos in PLD format used in the  
346 experiment.

347

### 348 **Action decoding across the whole brain**

349 To identify regions that showed selectivity for our action stimuli within each presentation  
350 position (upper/lower visual fields), classifiers were trained and tested with fMRI responses for  
351 stimuli presented within the same position. To identify regions showing position tolerance, we  
352 performed a cross-position classification. Classifiers were trained with fMRI responses to stimuli  
353 presented at the upper visual field and tested with fMRI responses to stimuli presented at the  
354 lower visual field and vice versa. Both within- and cross-position classification were applied  
355 using a surface-based searchlight method.

356 Figure 2A and B depict the result of the group analysis ( $q_1 = 0.05$  and  $q_2 = 0.01$ ) for  
357 within- and cross-position classification accuracy, respectively. Comparison of these maps  
358 reveals that a subset of the regions that show above chance within-position classification also  
359 demonstrate generalization across positions. The group analysis showed significantly above  
360 chance cross-position classification accuracy in the left and right lateral occipito-temporal  
361 cortex, right intraparietal sulcus, and right post-central gyrus (Figure 2B).

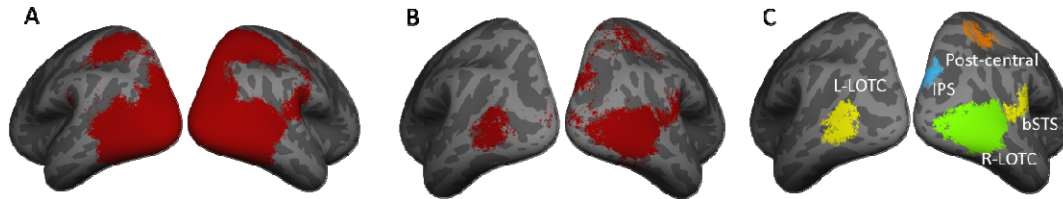

362

363 **Figure 2.** Results of searchlight classification accuracy **A**, Significance maps of group analysis  
364 for searchlight within-position classification accuracy (thresholded at  $q1 = 0.05$  and  $q2 = 0.01$ )

365 **B**, Significance maps of group analysis for searchlight cross-position classification accuracy

366 (group thresholded at  $q1 = 0.05$  and  $q2 = 0.01$ ) **C**, five Clusters with significant cross-position

367 classification accuracy used as ROIs (note that the exact ROIs differ slightly across iterations of  
368 the leave-one-subject-out procedure).

369

### 370 **Action decoding in ROIs**

371 To investigate the extent to which changes in position affect the representations in

372 individual regions, we used a leave-one subject out procedure (see methods) to extract ROIs

373 with above chance cross-decoding accuracy. Five clusters (Figure 2C) were selected based on

374 a searchlight analysis on all but one subject, and the selected clusters were used as ROIs for

375 the left-out subject.

376



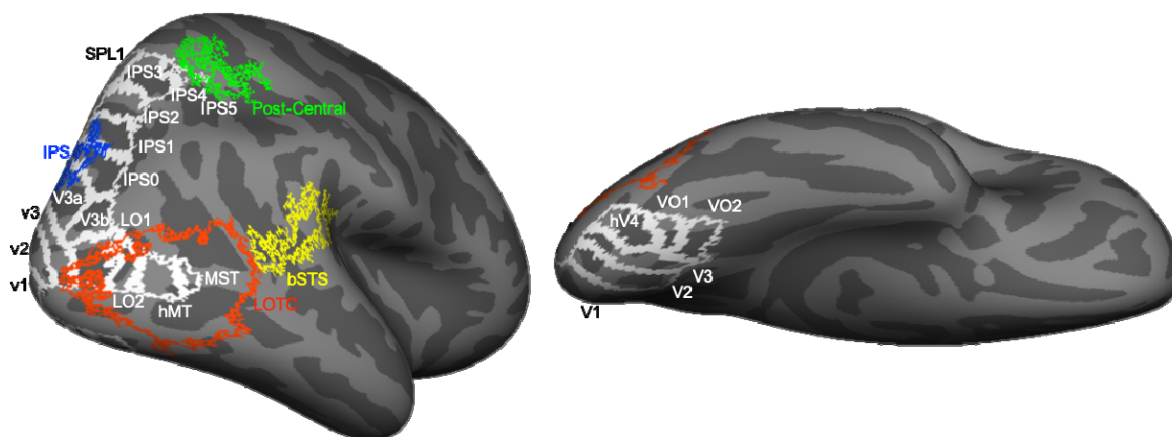

377

378 **Figure 3.** Inflated brain surface from a representative participant showing the ROIs examined in  
379 lateral and ventral views with white outlines for Wang's ROIs and colorful outlines for functional  
380 ROIs obtained from searchlight analysis.

381

382 A linear SVM was employed for within- and cross-position classification within each ROI,  
383 using the 100 most informative vertices in each ROI (Mitchell et al., 2004). Figure 4A illustrates  
384 the results of within- and cross-position decoding accuracy for each of the ROIs. All ROIs had a  
385 significant decoding accuracy for cross- and within-position (group analysis with  $(q_1 = 0.01, q_2 =$   
386  $0.01)$ ). In the left and right lateral occipito-temporal and parietal ROIs, cross-position decoding  
387 accuracy was significantly lower than within-position decoding accuracy (paired t-test,  $p <$   
388  $0.0075$ , FDR corrected  $q = 0.01$ ), while this difference was not significant in bSTS and Post-  
389 Central regions (paired t-test,  $p > 0.13$ , FDR corrected  $q = 0.01$ ). These results suggest a  
390 reduction in position sensitivity from posterior to anterior regions in both occipito-temporal and  
391 parietal cortices. To visualize this finding on the whole brain, we divided the cross-position by  
392 within-position classification accuracy in all vertices with above chance within-position accuracy.

393 The resulting map averaged across subjects is depicted in figure 4B. In line with the ROI  
394 analysis, this map demonstrates an increase in position tolerance from posterior to anterior  
395 regions in both occipito-temporal and parietal cortices.

396

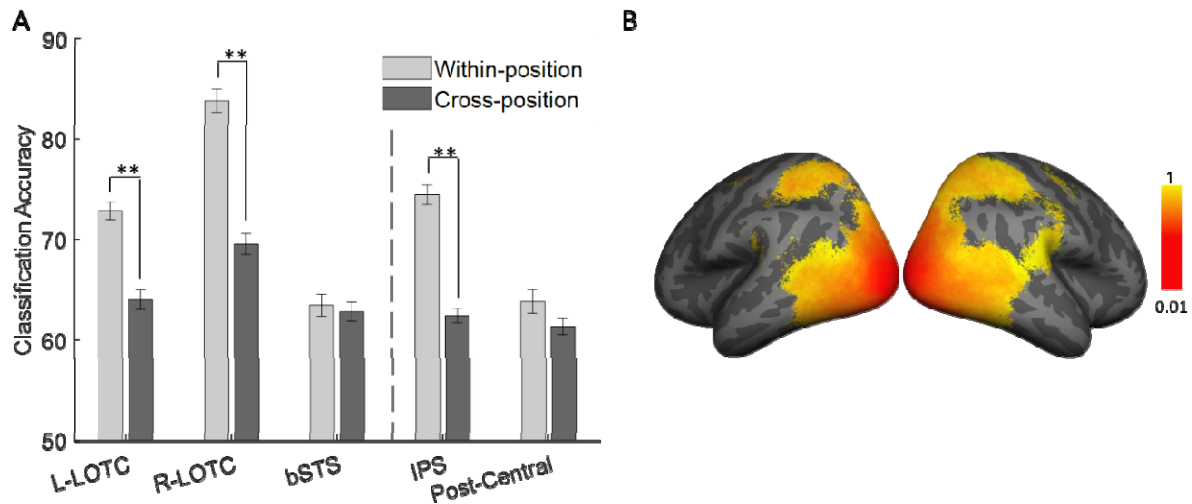

397

398 **Figure 4. A,** Within and cross-position decoding accuracy for the ROIs obtained from  
399 searchlight analysis. Error bars indicate standard errors of the means (\*\* paired t-test,  $p < 0.01$ ,  
400 FDR corrected). The vertical dashed line separates occipito-temporal ROIs from parietal ROIs

401 **B,** Maps of cross-position divided by within-position classification accuracy obtained from  
402 searchlight analysis in vertices with significant within-position classification accuracy.

403

#### 404 ***Revealing the Representational content of the ROIs***

405 To uncover the principles that govern the organization of action representations in each  
406 ROI, we used a representational similarity analysis (RSA, Kriegeskorte et al., 2008). We  
407 constructed models based on the body-part movements and behavioral similarity ratings  
408 performed on the videos by human observers (see methods). We then used correlation analysis  
409 to investigate the similarity of action representations between models and ROIs according to  
410 their cross-position pairwise decoding accuracies. The reliability of the behavioral dissimilarity

411 matrices was high (Cronbach Alpha = 0.7654). Models of stimuli (distance matrices obtained  
412 from models) were also compared with each other; the Kendall correlation was calculated, and  
413 its significance was examined applying permutation tests. The behavioral and body-part models  
414 were not significantly correlated (Kendall correlation = 0.0394,  $p$ -value = 0.2562).

415 Figure 5 shows the Kendall correlations between the models and cross-position pairwise  
416 decoding accuracies across participants for body-part movement and behavioral rating models.

417

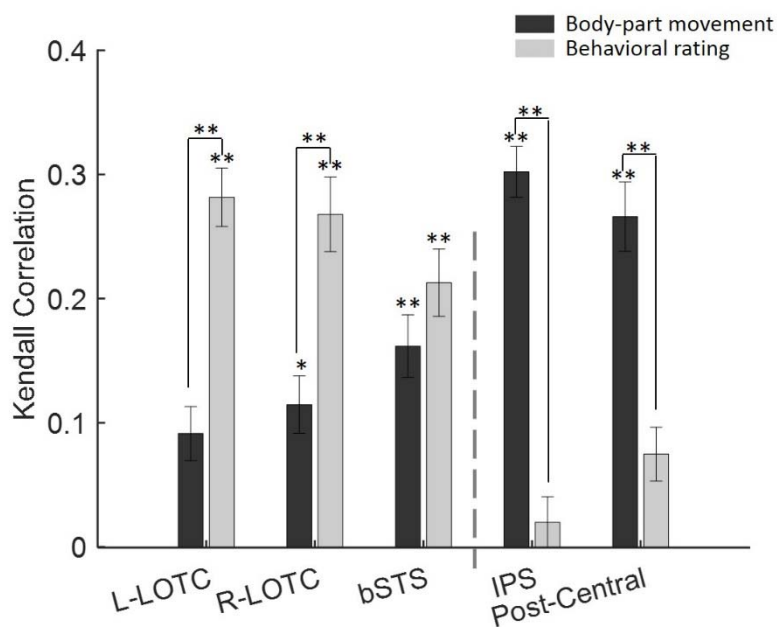

418

419 **Figure 5.** Kendall correlation body-part movement (dark gray) and behavioral rating models  
420 (light gray) and cross-position pairwise decoding accuracies for the individual ROIs. Error bars  
421 indicate standard errors of the mean (permutation test or paired t-test,  $*p < 0.05$ ,  $**p < 0.01$ ,  
422 FDR corrected). The vertical dashed line separates occipito-temporal ROIs from parietal ROIs.

423

424 Significant correlations were found with the body-part model in all ROIs except for L-  
425 LOTC (permutation test,  $p < 0.05$  for R-LOTC and  $p < 0.01$  for bSTS, IPS, Post-Central) and  
426 with the behavioral rating model in all ROIs except for IPS and Post-Central (permutation test,  $p$   
427  $< 0.01$ ).

428 A two-way repeated-measures ANOVA with model (body-part movement and behavioral  
429 rating) and ROI as independent factors and correlation coefficient as the dependent variable  
430 was performed. The effect of ROI ( $F(4,84) = 0.9303$ ,  $p = 0.4504$ ), and the effect of model  
431 ( $F(1,84) = 0.7636$ ,  $p = 0.3921$ ) were not significant while the interaction between the two  
432 ( $F(4,84) = 36.8$ ,  $p < 0.0001$ ) was significant. Individual comparisons within ROIs showed that  
433 correlation coefficients were greater for the behavioral rating model in L-LOTc and R-LOTc and  
434 for the body-part movement model in IPS and post-central (all  $t(21) > 3.7117$ , all  $p < 0.0016$ ,  
435 FDR-corrected).

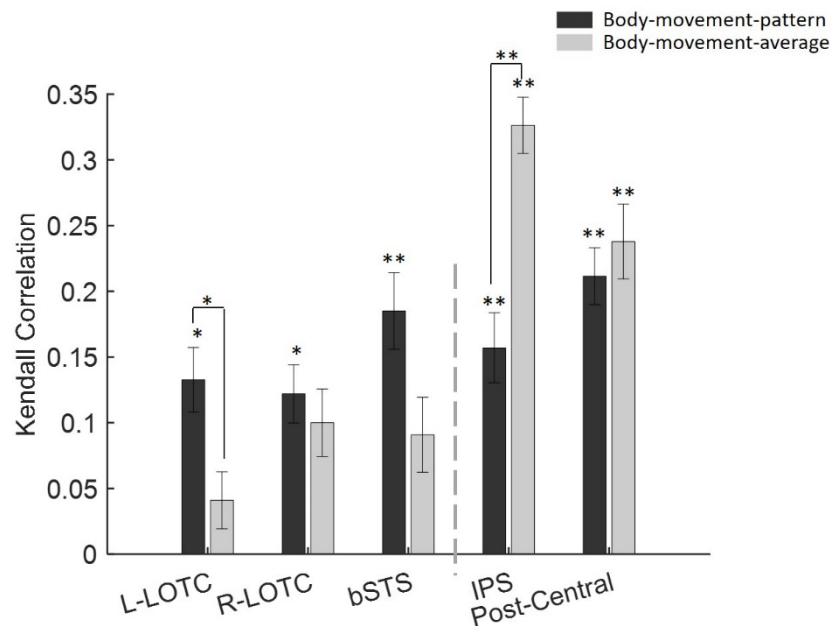

436  
437 **Figure 6.** Kendall correlation between body-movement-average (light gray) and body-  
438 movement-pattern (dark gray) models and cross-position pairwise decoding accuracies for  
439 individual ROIs. Error bars indicate standard errors of the mean (permutation test,  $*p < 0.05$ ,  $**p$   
440  $< 0.01$ , FDR corrected). The vertical dashed line separates occipito-temporal ROIs from parietal  
441 ROIs.

442  
443 We also constructed models based on the average of movement across all body-parts  
444 (body-movement-average) and based on the pattern of movements in body parts (body-

445 movement-pattern ) separately (see methods). Figure 6 shows the average Kendall correlation  
446 between the models and cross-position pairwise decoding accuracies across participants for  
447 body-movement-pattern and body-movement-average models. As figure 6 shows, all ROIs  
448 showed correlations with the body-movement-pattern model (permutation test,  $p < 0.05$  for L-  
449 LOTC and R-LOT,  $p < 0.01$  for bSTS, IPS and Post-Central, FDR corrected, 5 comparisons),  
450 but body-movement-average models only showed correlations with the dorsal ROIs  
451 (permutation test,  $p < 0.01$ , FDR corrected) and showed no significant correlation with the  
452 lateral ROIs (permutation test,  $p > 0.05$ , FDR corrected).

453 A two-way repeated measure ANOVA with model and ROI as independent factors and  
454 correlation coefficient as the dependent variable showed no significant effect of model ( $F(1,84)$   
455 = 0.0117,  $p = 0.9148$ ) while the effect of ROI ( $F(4,84) = 22.5280$ ,  $p < 0.0001$ ), and the  
456 interaction between the two ( $F(4,84) = 11.5105$ ,  $p < 0.0001$ ) were significant. The significant  
457 effect of ROI points to greater correlation coefficients in dorsal ROIs. Individual comparisons  
458 within ROIs showed that correlation coefficients were greater for the pattern model in L-LOT  
459 ( $t(21) = 2.6553$ ,  $p = 0.0370$ , FDR-corrected) and for the average model in IPS ( $t(21) = 4.9394$ ,  $p$   
460 = 3.4583e-04, FDR-corrected).

461 We also compared the behavioral rating model with the average and pattern models  
462 applying two separate two-way repeated measure ANOVAs with model and ROI as independent  
463 variables and correlation coefficient as the dependent variable.

464 Its result for the body-part-average and behavioral rating models showed no significant  
465 effect of ROI ( $F(4,84) = 1.1066$ ,  $p = 0.3589$ ), and model ( $F(1,84) = 0.3031$ ,  $p = 0.5878$ ) while  
466 the interaction between the two was significant ( $F(4,84) = 36.4416$ ,  $p < 0.0001$ ). Individual  
467 comparisons within ROIs showed that correlation coefficients were greater for the behavioral  
468 rating model in L-LOT and R-LOT and for the body-movement-average model in IPS and  
469 Post-Central (all  $t(21) > 3.5686$ , all  $p < 0.0018$ , FDR-corrected).

470 For the body-part-pattern and behavioral rating models results showed no significant  
471 effect of model ( $F(1,84) = 0.4335$ ,  $p = 0.5174$ ) while the effect of ROI ( $F(4,84) = 8.8253$ ,  $p =$   
472  $0.0001$ ), and interaction between the two ( $F(4,84) = 37.6654$ ,  $p < 0.0001$ ) were significant.  
473 Individual comparisons within ROIs showed that correlation coefficients were greater for the  
474 behavioral rating model in L-LOTc and R-LOTc and for the body-movement-pattern model in  
475 IPS and Post-Central (all  $t(21) > 4.8254$ , all  $p < 0.0001$ , FDR-corrected).

476 In sum, these results reveal dissociations between the classification accuracies in the  
477 lateral and dorsal ROIs. In lateral ROIs, the cross-position decoding accuracies are more  
478 correlated with behavioral ratings than any of the body-part movement models, while those in  
479 dorsal ROIs are more correlated with the objective movement models.

480

#### 481 ***ROI similarity analysis***

482 In addition to the 5 clusters obtained from the searchlight analysis, we obtained the  
483 cross-position decoding accuracy of retinotopic regions of interest across occipito-temporal and  
484 parietal cortex (see methods). We calculated cross-position classification accuracies for these  
485 ROIs following a similar procedure as that used for the ROIs obtained from searchlight analysis.  
486 Then, to examine the representational similarity across all ROIs (including retinotopic ROIs and  
487 ROIs obtained from searchlight analysis), we computed the one minus the correlation between  
488 their cross-position decoding accuracy (Figure 7A). The resulting ROI dissimilarity matrix had  
489 high split-half reliability of 0.8346, significantly higher than chance (bootstrapped null distribution  
490 95% CI [-0.0011,0.0012]). To visualize region-wise distances, we then applied an MDS analysis  
491 on this matrix. Figure 7B depicts the first two dimensions that captured most of the variance ( $r^2 =$   
492  $0.5522$ ). These results are consistent with the representational similarity analysis and further  
493 suggest the presence of two separate networks for processing actions. One starting from the  
494 early visual cortex going to the lateral surface of the brain, and another splitting from this  
495 pathway towards the parietal cortex with the bSTS region landing right between the two

496 pathways. This observation was quantified through fitting two total least square lines to the  
497 points on the MDS plot: one line was passed through occipito-temporal regions (V1, V2, V3,  
498 hV4, VO1, VO2, MST, hMT, LO2, LO1, V3b, and V3a from the wang atlas, and L-LOTc, R-  
499 LOTc, and bSTS from our ROI analysis) and the other line was passed through parietal regions  
500 (IPS0, IPS1, IPS2, IPS3, IPS4, IPS5, and SPL1 from wang atlas and IPS and Post-Central from  
501 our ROI analysis). These lines could explain 0.7950 percent of the variance of the positions of  
502 the regions on the MDS plot and 0.4798 percent of the variance of the full multi-dimensional  
503 space.  
504

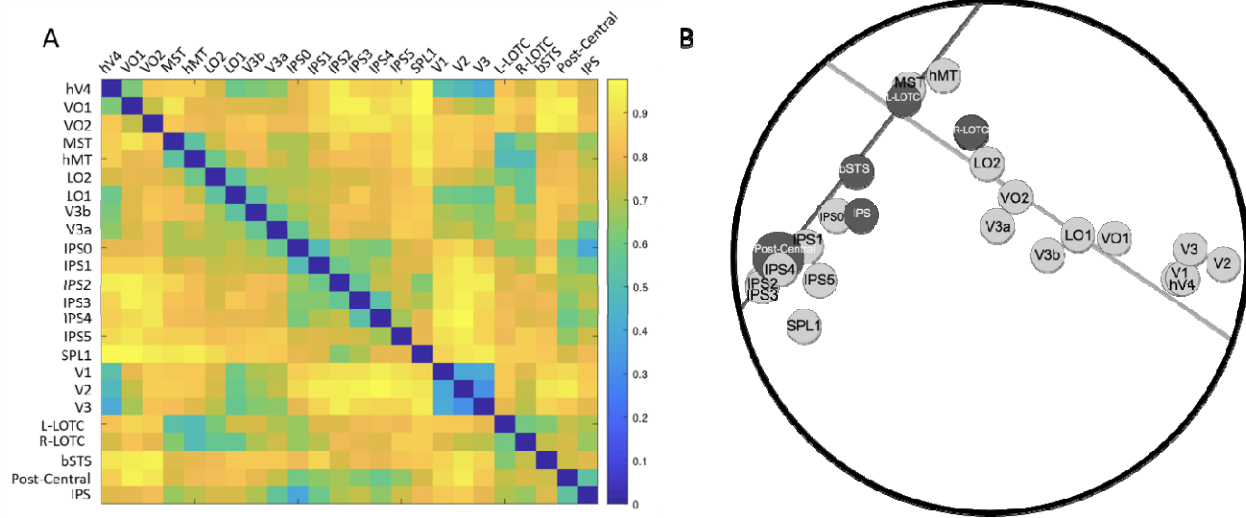

506 **Figure 7. A**, ROI dissimilarity matrix based on the correlation distance between their cross-  
507 position decoding accuracy for Wang's ROI and ROIs obtained from searchlight analysis.  
508 Lighter colors show higher correlations **B**, MDS plot of Wang's ROIs (light gray) and ROIs  
509 obtained from searchlight analysis (dark gray) and a total least square regression line through  
510 the occipito-temporal regions (the light gray line) and another through the parietal regions (the  
511 dark gray line). The MDS plot and the lines could capture 0.5522 and 0.4798 percent of the  
512 variance of the ROI dissimilarity matrix.

513

514

## Discussion

515           In this article, we used point-light displays of human actions presented in either the  
516 upper or the lower visual fields and examined the extent of position tolerance as well as the  
517 representational content of action selective regions in the human brain. Using cross-position  
518 decoding analysis, we found that regions in the Left and right lateral occipitotemporal cortex,  
519 right intraparietal sulcus, and right post-central gyrus contain position tolerant representations of  
520 action stimuli. Additionally, we investigated the representational content of these regions and  
521 found that representations in parietal regions were related to the movements of the body-parts  
522 while those in occipitotemporal regions were more related to human subjective judgments about  
523 actions.

524           Our results, for the first time, provide a comprehensive understanding of position-tolerant  
525 action representations in the human visual cortex. Our findings in the lateral occipital cortex are  
526 consistent with those of Grossman et al. (2010) that applied fMRI adaptation and showed  
527 position tolerant representation of actions in STS. However, they failed to find other position  
528 invariant regions found in our study, especially the regions in the parietal cortex. This  
529 discrepancy may be related to differences in design. Our block design paradigm and the use of  
530 SVM classifiers may have provided us with a higher power and sensitivity to detect regions that  
531 contain position-tolerant action representation (Coutanche et al., 2016). Roth and Zohary (2015)  
532 investigated position invariance during observation of natural tool-grasping clips using MVPA  
533 (correlation and cross-decoding classifier). They observed a gradual loss of position information  
534 accompanied by enhancement of hand/tool identity along the posterior-anterior axis in the  
535 dorsal stream. This result is consistent with our finding for the parietal cortex, but they didn't  
536 observe such a gradient in the lateral stream. Their focus on grasping actions may have  
537 lowered their chance of observing the full extent of position tolerance in the lateral occipito-  
538 temporal cortex.



539 Most regions that contained position tolerant representations of actions in our study were  
540 located in the right hemisphere. This laterality toward the right hemisphere is in line with the  
541 results of previous studies. Beauchamp et al. (2003) investigated human motion versus tool  
542 motion (natural and PLD video clips). They found that category-related responses were  
543 lateralized with a significantly greater number of tool-preferring voxels in the left hemisphere and  
544 a significantly greater number of human-preferring voxels in the right hemisphere. Grosbras et  
545 al. (2012) performed a meta-analysis on three categories of human motion including the  
546 movement of the whole body, hands and face. The conjunction of the three meta-analysis maps  
547 showed convergence in the right posterior superior temporal sulcus and the bilateral junction  
548 between middle temporal and lateral occipital gyri. Right laterality in parietal regions has also  
549 been previously reported for observed limb movements (Grosbras et al., 2012; Pelphrey et al.,  
550 2005).

551 After identifying the position-tolerant regions, we investigated their representational  
552 content. In occipito-temporal cortex, we found that a model based on the behavioral ratings of  
553 similarity was the best predictor of the cross-position pattern classification accuracies. These  
554 results are consistent with a study by Tucciarelli et al. (2019) that used natural images of  
555 different actions and showed that responses in the LOTC were correlated with the behavioral  
556 ratings of semantic similarity between actions. Similar to our results, they also showed a lower  
557 correlation in LOTC with a model based on body movements. On the other hand, they failed to  
558 find a significant correlation with a body part model in the parietal cortex. This could be because  
559 they used human ratings of body part movements as opposed to the objective measures we  
560 used based on actual measures of body position. Humans may fail to consider the movement of  
561 all body parts and only focus on just the main effector of action for their ratings. In addition, they  
562 also employed an event-related design that has less power than our block design paradigm.  
563 Thus, our results extend their findings and further elucidate the differences between parietal and  
564 occipito-temporal action representations.

565 In a study with a large set of human action videos, Tarhan and Konkle (2020) used  
566 behavioral rating to construct an encoding model to investigate action representations in the  
567 human brain. Their behavioral ratings included questions related to body parts involved in the  
568 action as well as the action target. Using a clustering analysis, they divided voxels into four  
569 network, suggesting that one is driven by the social aspects of actions and four are driven by  
570 the scale of the interaction envelope. Consistent with our study, their clusters spanned both  
571 occipitotemporal and parietal regions, with notable differences in response profile between the  
572 two networks. However, it is difficult to be more specific in comparing their results to our findings  
573 due to methodological differences. They used natural videos of everyday scenes containing  
574 actions as stimuli. Other than human bodies or body parts performing the action, their stimuli  
575 also contained objects and other scene elements. The use of natural stimuli makes it difficult to  
576 determine if the clusters reflect responses to actions or the scene elements correlated with the  
577 actions. Also, since we used a block design paradigm and aimed at determining the extent of  
578 position invariance in action selective regions, we could only collect data from a small set of  
579 actions. Future studies with a larger set of controlled PLD stimuli could test the extent to which  
580 sociality and interaction envelope determine the responses in position invariant action selective  
581 regions in the brain.

582 Investigating the representations of actions in the dorsal stream, Buccino et al. (2001)  
583 suggested that dorsal regions represent actions based on action effectors. Jastorff et al. (2010),  
584 Abdollahi et al. (2013), and Vannuscorps et al. (2018), on the other hand, provided evidence  
585 that action representations in dorsal regions are organized based on the category of actions  
586 independent of the effectors. Here, we show that a model based on body-part movement shows  
587 high correlations with the pattern of classification accuracies in the dorsal stream regions. Our  
588 body-part movement model was constructed based on the movement of all body parts, including  
589 the trunk and the limbs. This model included more information than just the action effector. High  
590 correlations of this model with the classification accuracies in the dorsal regions suggests that

591 dorsal regions may contain a more holistic representation of body parts during action  
592 observation.

593 Even though lateral regions show higher correlations with the subjective model than the  
594 body part model, their correlation with the body part movement was still above zero. Therefore  
595 lateral regions show signatures of both objective and subjective measures. Nevertheless, more  
596 detailed analysis of the body part model separating the patterns of movement from average  
597 movements revealed further differences between the dorsal and lateral regions. While the  
598 dorsal regions showed sensitivity to both pattern and average of movements, the lateral regions  
599 showed only a correlation with a model based on patterns of movement. With the limited  
600 number of stimuli in our set, we cannot perform a more nuanced analysis of the differences in  
601 the sensitivity to various body parts between dorsal and lateral regions. Future experiments with  
602 an expanded set of PLD stimuli could reveal potential differences between the two networks in  
603 their body part representations.

604 In the domain of object representations, recent studies have revealed that both dorsal  
605 and ventral stream regions contain object information independent of the position of objects  
606 (Vaziri-Pashkam and Xu, 2019; Almeida et al., 2018), but data-driven analysis of object  
607 representation still reveals the separation of these dorsal and ventral regions in their  
608 representational (Vaziri-Pashkam and Xu, 2019). Here, focusing on action observation, we  
609 showed that action representations become progressively less position-dependent from  
610 posterior to anterior along both dorsal and lateral pathways. Moreover, employing either data-  
611 driven (looking at ROI similarities) or model-based approaches, we observed a clear distinction  
612 between representational content in two pathways. Looking more closely at the arrangement of  
613 ROIs in the MDS plot, we can see that ROIs along the lateral surface follow a continuous  
614 trajectory from early visual areas while dorsal ROIs are separated away from both early visual  
615 and lateral ROIs. These results provide evidence for distinct representational content along the  
616 two pathways.

617           Embodied cognition theories argue that recognition of observed actions relies on  
618 sensory-motor simulation and taps into motor representation necessary for executing those  
619 actions (Rizzolatti & Craighero, 2004; Pulvermüller, 2013). Motor, premotor, and parietal regions  
620 that contain mirror neurons in Macaque monkeys have been proposed as potential regions  
621 contributing to action recognition through motor simulation (Rizzolatti & Craighero, 2004). In our  
622 study we failed to find position tolerant representations in prefrontal and premotor regions, and  
623 the representations in our parietal regions did not show correlation with the model based on  
624 subjective judgments on actions. These results suggest that the motor, premotor and parietal  
625 regions are unlikely to contribute to the subjective understanding of actions (Caramazza et al.,  
626 2014). Nevertheless, it is still possible that parietal regions would contribute to action  
627 observation during coupled motor interactions as well as motor imitations (Caspers et al., 2010)  
628 through analysis of body part movements. Our results suggest distinct roles for dorsal and  
629 lateral regions in action observation.

630           In summary, we found regions capable of representing highly abstract forms of observed  
631 human actions, namely the point light display video clips of actions across changes in position.  
632 These regions located in lateral occipito-temporal and parietal cortices contained distinct  
633 representational content. The lateral regions reflected more strongly the human subjective  
634 knowledge about objects, while the dorsal regions reflected only the objective bodily  
635 movements. These results suggest the existence of two distinct networks that contain abstract  
636 representations of human actions likely serving different purposes in the visual processing of  
637 actions.  
638

639

## References

- 640 Abdollahi, R. O., Jastorff, J., & Orban, G. A. (2013). Common and segregated processing of  
641 observed actions in human SPL. *Cerebral cortex*, *23*(11), 2734-2753.
- 642 Albertini, D., Gerbella, M., Lanzilotto, M., Livi, A., Maranesi, M., Ferroni, C. G., & Bonini, L.  
643 (2020). Connectional gradients underlie functional transitions in monkey pre-  
644 supplementary motor area. *Progress in neurobiology*, *184*, 101699.
- 645 Allefeld, C., Gørgen, K., & Haynes, J. D. (2016). Valid population inference for information-  
646 based imaging: From the second-level t-test to prevalence inference. *Neuroimage*, *141*,  
647 378-392.
- 648 Almeida, J., Amaral, L., Garcea, F. E., Aguiar de Sousa, D., Xu, S., Mahon, B. Z., & Martins, I.  
649 P. (2018). Visual and visuomotor processing of hands and tools as a case study of cross  
650 talk between the dorsal and ventral streams. *Cognitive neuropsychology*, *35*(5-6), 288-  
651 303.
- 652 Anzellotti, S., Fairhall, S. L., & Caramazza, A. (2013). Decoding representations of face identity  
653 that are tolerant to rotation. *Cerebral Cortex*, *24*(8), 1988-1995.
- 654 Barz, F., Livi, A., Lanzilotto, M., Maranesi, M., Bonini, L., Paul, O., & Ruther, P. (2017).  
655 Versatile, modular 3D microelectrode arrays for neuronal ensemble recordings: from  
656 design to fabrication, assembly, and functional validation in non-human primates.  
657 *Journal of neural engineering*, *14*(3), 036010.
- 658 Benjamini, Y., & Hochberg, Y. (1995). Controlling the false discovery rate: a practical and  
659 powerful approach to multiple testing. *Journal of the Royal statistical society: series B*  
660 *(Methodological)*, *57*(1), 289-300.
- 661 Brainard, D. H. (1997). The psychophysics toolbox. *Spatial vision*, *10*(4), 433-436.
- 662 Buccino, G., Binkofski, F., Fink, G. R., Fadiga, L., Fogassi, L., Gallese, V., ... & Freund, H. J.  
663 (2001). Action observation activates premotor and parietal areas in a somatotopic  
664 manner: an fMRI study. *European journal of neuroscience*, *13*(2), 400-404.

- 665 Buxbaum, L. J., Kyle, K. M., Tang, K., & Detre, J. A. (2006). Neural substrates of knowledge of  
666 hand postures for object grasping and functional object use: Evidence from fMRI. *Brain*  
667 *Research*, 1117(1), 175-185.
- 668 Caramazza, A., Anzellotti, S., Strnad, L., & Lingnau, A. (2014). Embodied cognition and mirror  
669 neurons: a critical assessment. *Annual review of neuroscience*, 37, 1-15.
- 670 Caspers, S., Zilles, K., Laird, A. R., & Eickhoff, S. B. (2010). ALE meta-analysis of action  
671 observation and imitation in the human brain. *Neuroimage*, 50(3), 1148-1167.
- 672 Chang, C. C., & Lin, C. J. (2011). LIBSVM: A library for support vector machines. *ACM*  
673 *transactions on intelligent systems and technology (TIST)*, 2(3), 27.
- 674 Cichy, R. M., Chen, Y., & Haynes, J. D. (2011). Encoding the identity and location of objects in  
675 human LOC. *Neuroimage*, 54(3), 2297-2307.
- 676 Cichy, R. M., Sterzer, P., Heinzle, J., Elliott, L. T., Ramirez, F., & Haynes, J. D. (2013). Probing  
677 principles of large-scale object representation: Category preference and location  
678 encoding. *Human Brain Mapping*, 34(7), 1636-1651.
- 679 Coutanche, M. N., Solomon, S. H., & Thompson-Schill, S. L. (2016). A meta-analysis of fMRI  
680 decoding: Quantifying influences on human visual population codes. *Neuropsychologia*,  
681 82, 134-141.
- 682 Culham, J. C., Danckert, S. L., De Souza, J. F., Gati, J. S., Menon, R. S., & Goodale, M. A.  
683 (2003). Visually guided grasping produces fMRI activation in dorsal but not ventral  
684 stream brain areas. *Experimental brain research*, 153(2), 180-189.
- 685 DiCarlo, J. J., & Cox, D. D. (2007). Untangling invariant object recognition. *Trends in cognitive*  
686 *sciences*, 11(8), 333-341.
- 687 Downing, P. E., Peelen, M. V., Wiggett, A. J., & Tew, B. D. (2006). The role of the extrastriate  
688 body area in action perception. *Social Neuroscience*, 1(1), 52-62.
- 689 Dale, A. M., Fischl, B., & Sereno, M. I. (1999). Cortical surface-based analysis: I. Segmentation  
690 and surface reconstruction. *Neuroimage*, 9(2), 179-194.

- 691 El-Sourani, N., Wurm, M. F., Trempler, I., Fink, G. R., & Schubotz, R. I. (2018). Making sense of  
692 objects lying around: How contextual objects shape brain activity during action  
693 observation. *Neuroimage*, *167*, 429-437.
- 694 Etzel, J. A., Zacks, J. M., & Braver, T. S. (2013). Searchlight analysis: promise, pitfalls, and  
695 potential. *Neuroimage*, *78*, 261-269.
- 696 Ferri, S., Rizzolatti, G., & Orban, G. A. (2015). The organization of the posterior parietal cortex  
697 devoted to upper limb actions: An fMRI study. *Human brain mapping*, *36*(10), 3845-  
698 3866.
- 699 Giese, M. A., & Poggio, T. (2003). Neural mechanisms for the recognition of biological  
700 movements. *Nature Reviews Neuroscience*, *4*(3), 179-192.
- 701 Grosbras, M. H., Beaton, S., & Eickhoff, S. B. (2012). Brain regions involved in human  
702 movement perception: A quantitative voxel-based meta-analysis. *Human brain*  
703 *mapping*, *33*(2), 431-454.
- 704 Grossman, E. D., Jardine, N. L., & Pyles, J. A. (2010). fMR-adaptation reveals invariant coding  
705 of biological motion on human STS. *Frontiers in human neuroscience*, *4*, 15.
- 706 Hafri, A., Trueswell, J. C., & Epstein, R. A. (2017). Neural representations of observed actions  
707 generalize across static and dynamic visual input. *Journal of Neuroscience*, *37*(11),  
708 3056-3071.
- 709 Haxby, J. V. (2012). Multivariate pattern analysis of fMRI: the early beginnings. *Neuroimage*,  
710 *62*(2), 852-855.
- 711 Isik, L., Koldewyn, K., Beeler, D., & Kanwisher, N. (2017). Perceiving social interactions in the  
712 posterior superior temporal sulcus. *Proceedings of the National Academy of Sciences*,  
713 *114*(43), E9145-E9152.
- 714 Jastorff, J., & Orban, G. A. (2009). Human functional magnetic resonance imaging reveals  
715 separation and integration of shape and motion cues in biological motion processing.  
716 *Journal of Neuroscience*, *29*(22), 7315-7329.

- 717 Jastorff, J., Begliomini, C., Fabbri-Destro, M., Rizzolatti, G., & Orban, G. A. (2010). Coding  
718 observed motor acts: different organizational principles in the parietal and premotor  
719 cortex of humans. *Journal of neurophysiology*, *104*(1), 128-140.
- 720 Johnson-Frey, S. H. (2004). The neural bases of complex tool use in humans. *Trends in*  
721 *cognitive sciences*, *8*(2), 71-78.
- 722 Kalénine, S., Buxbaum, L. J., & Coslett, H. B. (2010). Critical brain regions for action  
723 recognition: lesion symptom mapping in left hemisphere stroke. *Brain*, *133*(11), 3269-  
724 3280.
- 725 Konen, C. S., & Kastner, S. (2008). Two hierarchically organized neural systems for object  
726 information in human visual cortex. *Nature neuroscience*, *11*(2), 224.
- 727 Kourtzi, Z., & Kanwisher, N. (2000). Activation in human MT/MST by static images with implied  
728 motion. *Journal of cognitive neuroscience*, *12*(1), 48-55.
- 729 Kriegeskorte, N., Mur, M., & Bandettini, P. A. (2008). Representational similarity analysis-  
730 connecting the branches of systems neuroscience. *Frontiers in systems neuroscience*,  
731 *2*, 4.
- 732 Kriegeskorte, N. & Mur, M. (2012). Inverse MDS: Inferring Dissimilarity Structure from Multiple  
733 Item Arrangements. *Front. Psychol.* *3*, 1–13.
- 734 Lanzilotto, M., Maranesi, M., Livi, A., Ferroni, C. G., Orban, G. A., & Bonini, L. (2020). Stable  
735 readout of observed actions from format-dependent activity of monkey's anterior  
736 intraparietal neurons. *Proceedings of the National Academy of Sciences*, *117*(28),  
737 16596-16605.
- 738 Leshinskaya, A., Wurm, M. F., Caramazza, A., & Leshinskaya, A. (2018). Concepts of Actions  
739 and their Objects. M Gazzaniga, GR Mangun, D Poepped. *The Cognitive*  
740 *Neurosciences*, 757-765.
- 741 Lingnau, A., & Downing, P. E. (2015). The lateral occipitotemporal cortex in action. *Trends in*  
742 *cognitive sciences*, *19*(5), 268-277.



- 743 Livi, A., Lanzilotto, M., Maranesi, M., Fogassi, L., Rizzolatti, G., & Bonini, L. (2019). Agent-  
744 based representations of objects and actions in the monkey pre-supplementary motor  
745 area. *Proceedings of the National Academy of Sciences*, *116*(7), 2691-2700.
- 746 Maeda, K., Ishida, H., Nakajima, K., Inase, M., & Murata, A. (2015). Functional properties of  
747 parietal hand manipulation–related neurons and mirror neurons responding to vision of  
748 own hand action. *Journal of cognitive neuroscience*, *27*(3), 560-572.
- 749 Maranesi, M., Livi, A., & Bonini, L. (2015). Processing of own hand visual feedback during  
750 object grasping in ventral premotor mirror neurons. *Journal of Neuroscience*, *35*(34),  
751 11824-11829
- 752 McMahon, E. G., Zheng, C. Y., Pereira, F., Gonzalez, R., Ungerleider, L. G., & Vaziri-Pashkam,  
753 M. (2019). Subtle predictive movements reveal actions regardless of social  
754 context. *Journal of vision*, *19*(7), 16-16.
- 755 Michels, L., Lappe, M., & Vaina, L. M. (2005). Visual areas involved in the perception of human  
756 movement from dynamic form analysis. *Neuroreport*, *16*(10), 1037-1041.
- 757 Mitchell TM, Hutchinson R, Niculescu RS, Pereira F, Wang XR, Just M, Newman S (2004)  
758 Learning to decode cognitive states from brain images. *Machine Learning* *57*:145–175.
- 759 Mur, M., Ruff, D. A., Bodurka, J., Bandettini, P. A., & Kriegeskorte, N. (2010). Face-identity  
760 change activation outside the face system: “release from adaptation” may not always  
761 indicate neuronal selectivity. *Cerebral Cortex*, *20*(9), 2027-2042.
- 762 Ogawa, K., & Inui, T. (2011). Neural representation of observed actions in the parietal and  
763 premotor cortex. *Neuroimage*, *56*(2), 728-735.
- 764 Oosterhof, N. N., Connolly, A. C., & Haxby, J. V. (2016). CoSMoMVPA: multi-modal multivariate  
765 pattern analysis of neuroimaging data in Matlab/GNU Octave. *Frontiers in*  
766 *neuroinformatics*, *10*, 27.
- 767 Oosterhof, N. N., Tipper, S. P., & Downing, P. E. (2012). Viewpoint (in) dependence of action  
768 representations: an MVPA study. *Journal of Cognitive Neuroscience*, *24*(4), 975-989.

- 769 Oosterhof, N. N., Wiestler, T., Downing, P. E., & Diedrichsen, J. (2011). A comparison of  
770 volume-based and surface-based multi-voxel pattern analysis. *Neuroimage*, *56*(2), 593-  
771 600.
- 772 Oram, M. W., & Perrett, D. I. (1996). Integration of form and motion in the anterior superior  
773 temporal polysensory area (STPa) of the macaque monkey. *Journal of neurophysiology*,  
774 *76*(1), 109-129.
- 775 Peelen, M. V., Wiggett, A. J., & Downing, P. E. (2006). Patterns of fMRI activity dissociate  
776 overlapping functional brain areas that respond to biological motion. *Neuron*, *49*(6), 815-  
777 822.
- 778 Pelphrey, K. A., Morris, J. P., Michelich, C. R., Allison, T., & McCarthy, G. (2005). Functional  
779 anatomy of biological motion perception in posterior temporal cortex: an fMRI study of  
780 eye, mouth and hand movements. *Cerebral cortex*, *15*(12), 1866-1876.
- 781 Pulvermüller, F. (2013). Semantic embodiment, disembodiment or misembodiment? In search  
782 of meaning in modules and neuron circuits. *Brain and language*, *127*(1), 86-103.
- 783 Ramírez, F. M., Cichy, R. M., Allefeld, C., & Haynes, J. D. (2014). The neural code for face  
784 orientation in the human fusiform face area. *Journal of Neuroscience*, *34*(36), 12155-  
785 12167.
- 786 Rizzolatti, G., & Craighero, L. (2004). The mirror-neuron system. *Annu. Rev. Neurosci.*, *27*, 169-  
787 192.
- 788 Roth, Z. N., & Zohary, E. (2015). Position and identity information available in fMRI patterns of  
789 activity in human visual cortex. *Journal of Neuroscience*, *35*(33), 11559-11571.
- 790 Sartori, L., Begliomini, C., Castiello, U. (2013). Motor resonance in left- and right-handers:  
791 evidence for effector-independent motor representations. *Front. Hum. Neurosci.* *7*, 33.
- 792 Schubotz, R. I., Wurm, M. F., Wittmann, M. K., & von Cramon, D. Y. (2014). Objects tell us what  
793 action we can expect: dissociating brain areas for retrieval and exploitation of action  
794 knowledge during action observation in fMRI. *Frontiers in psychology*, *5*, 636.

- 795 Senior, C., Barnes, J., Giampietroc, V., Simmons, A., Bullmore, E. T., Brammer, M., & David, A.  
796 S. (2000). The functional neuroanatomy of implicit-motion perception or ‘representational  
797 momentum’. *Current Biology*, *10*(1), 16-22.
- 798 Shmuelof, L., Zohary, E. (2006). A mirror representation of others’ actions in the human anterior  
799 parietal cortex. *J. Neurosci.* *26*, 9736–9742.
- 800 Shmuelof, L., Zohary, E. (2008). Mirror-image representation of action in the anterior pari- etal  
801 cortex. *Nat. Neurosci.* *11*, 1267–1269.
- 802 Simone, L., Bimbi, M., Rodà, F., Fogassi, L., & Rozzi, S. (2017). Action observation activates  
803 neurons of the monkey ventrolateral prefrontal cortex. *Scientific reports*, *7*(1), 1-13.
- 804 Tarhan, L., & Konkle, T. (2020). Sociality and interaction envelope organize visual action.  
805 representations. *Nature Communications*, *11*(1), 1-11.
- 806 Tucciarelli, R., Turella, L., Oosterhof, N. N., Weisz, N., & Lingnau, A. (2015). MEG multivariate  
807 analysis reveals early abstract action representations in the lateral occipitotemporal  
808 cortex. *Journal of Neuroscience*, *35*(49), 16034-16045.
- 809 Tucciarelli, R., Wurm, M., Baccolo, E., & Lingnau, A. (2019). The representational space of  
810 observed actions. *Elife*, *8*, e47686.
- 811 Urgen, B. A., Pehlivan, S., & Saygin, A. P. (2019). Distinct representations in occipito-temporal,  
812 parietal, and premotor cortex during action perception revealed by fMRI and  
813 computational modeling. *Neuropsychologia*, *127*, 35-47.
- 814 Urgen, B. A., & Orban, G. A. (2021). The unique role of parietal cortex in action observation:  
815 Functional organization for communicative and manipulative actions. *bioRxiv*.
- 816 Urgesi, C., Candidi, M., & Avenanti, A. (2014). Neuroanatomical substrates of action perception  
817 and understanding: an anatomic likelihood estimation meta-analysis of lesion-symptom  
818 mapping studies in brain injured patients. *Frontiers in human neuroscience*, *8*, 344.
- 819 Vangeneugden, J., Peelen, M. V., Tadin, D., & Battelli, L. (2014). Distinct neural mechanisms  
820 for body form and body motion discriminations. *Journal of Neuroscience*, *34*(2), 574-585.

- 821 Vannuscorps, G., F Wurm, M., Striem-Amit, E., & Caramazza, A. (2018). Large-scale  
822 organization of the hand action observation network in individuals born without hands.  
823 *Cerebral Cortex*, 29(8), 3434-3444.
- 824 Vanrie, J., & Verfaillie, K. (2004). Perception of biological motion: A stimulus set of human point-  
825 light actions. *Behavior Research Methods, Instruments, & Computers*, 36(4), 625-629.
- 826 Vaziri-Pashkam, M., & Xu, Y. (2019). An information-driven 2-pathway characterization of  
827 occipitotemporal and posterior parietal visual object representations. *Cerebral Cortex*,  
828 29(5), 2034-2050.
- 829 Wang, L., Mruczek, R. E., Arcaro, M. J., & Kastner, S. (2014). Probabilistic maps of visual  
830 topography in human cortex. *Cerebral cortex*, 25(10), 3911-3931.
- 831 Watson, C. E., Cardillo, E. R., Ianni, G. R., & Chatterjee, A. (2013). Action concepts in the brain:  
832 an activation likelihood estimation meta-analysis. *Journal of cognitive*  
833 *neuroscience*, 25(8), 1191-1205.
- 834 Wheaton, K. J., Thompson, J. C., Syngienotis, A., Abbott, D. F., & Puce, A. (2004). Viewing the  
835 motion of human body parts activates different regions of premotor, temporal, and  
836 parietal cortex. *Neuroimage*, 22(1), 277-288.
- 837 Wurm, M. F., Artemenko, C., Giuliani, D., & Schubotz, R. I. (2017a). Action at its place:  
838 Contextual settings enhance action recognition in 4-to 8-year-old  
839 children. *Developmental psychology*, 53(4), 662.
- 840 Wurm, M. F., Caramazza, A., & Lingnau, A. (2017b). Action categories in lateral  
841 occipitotemporal cortex are organized along sociality and transitivity. *Journal of*  
842 *Neuroscience*, 37(3), 562-575.
- 843 Wurm, M. F., Cramon, D. Y., & Schubotz, R. I. (2012). The context–object–manipulation triad:  
844 Cross talk during action perception revealed by fMRI. *Journal of Cognitive*  
845 *Neuroscience*, 24(7), 1548-1559.

846 Wurm, M. F., & Schubotz, R. I. (2017). What's she doing in the kitchen? Context helps when  
847 actions are hard to recognize. *Psychonomic bulletin & review*, 24(2), 503-509.

848 Xu, Y., & Vaziri-Pashkam, M. (2020). The development of transformation tolerant visual  
849 representations differs between the human brain and convolutional neural  
850 networks. *bioRxiv*.

851

852

853

854

855

856

857

858

859

860

861

862

863

864

865

866

867

868

869

870

871
